CORRECTION

# Correction: The Long Term Response of Birds to Climate Change: New Results from a Cold Stage Avifauna in Northern England

The *PLOS ONE* Staff

## Notice of Republication

This article was republished on June 26, 2015, to correct Fig 4, which was darker than intended. The publisher apologizes for the error. In addition, the family names "Scolopacidae" and "Charadriidae" have been un-italicized in Table 1, and tracked changes have been removed from S1 File. Please download this article again to view the corrected version.

## Reference

1. Stewart JR, Jacobi RM (2015) The Long Term Response of Birds to Climate Change: New Results from a Cold Stage Avifauna in Northern England. *PLoS ONE* 10(5): e0122617. doi:[10.1371/journal.pone.0122617](https://doi.org/10.1371/journal.pone.0122617) PMID: [25992609](https://pubmed.ncbi.nlm.nih.gov/25992609/)

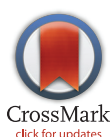

## OPEN ACCESS

**Citation:** The *PLOS ONE* Staff (2015) Correction: The Long Term Response of Birds to Climate Change: New Results from a Cold Stage Avifauna in Northern England. *PLoS ONE* 10(7): e0133107. doi:[10.1371/journal.pone.0133107](https://doi.org/10.1371/journal.pone.0133107)

**Published:** July 14, 2015

**Copyright:** © 2015 The PLOS ONE Staff. This is an open access article distributed under the terms of the [Creative Commons Attribution License](https://creativecommons.org/licenses/by/4.0/), which permits unrestricted use, distribution, and reproduction in any medium, provided the original author and source are credited.
